# Supplementary material
Source: Springer Nature journal article supplement (https://www.springermedizin.de/resource/supplementary/12913_2013_2963_MOESM1_ESM.pdf/9532302)

# Mean number of PPY

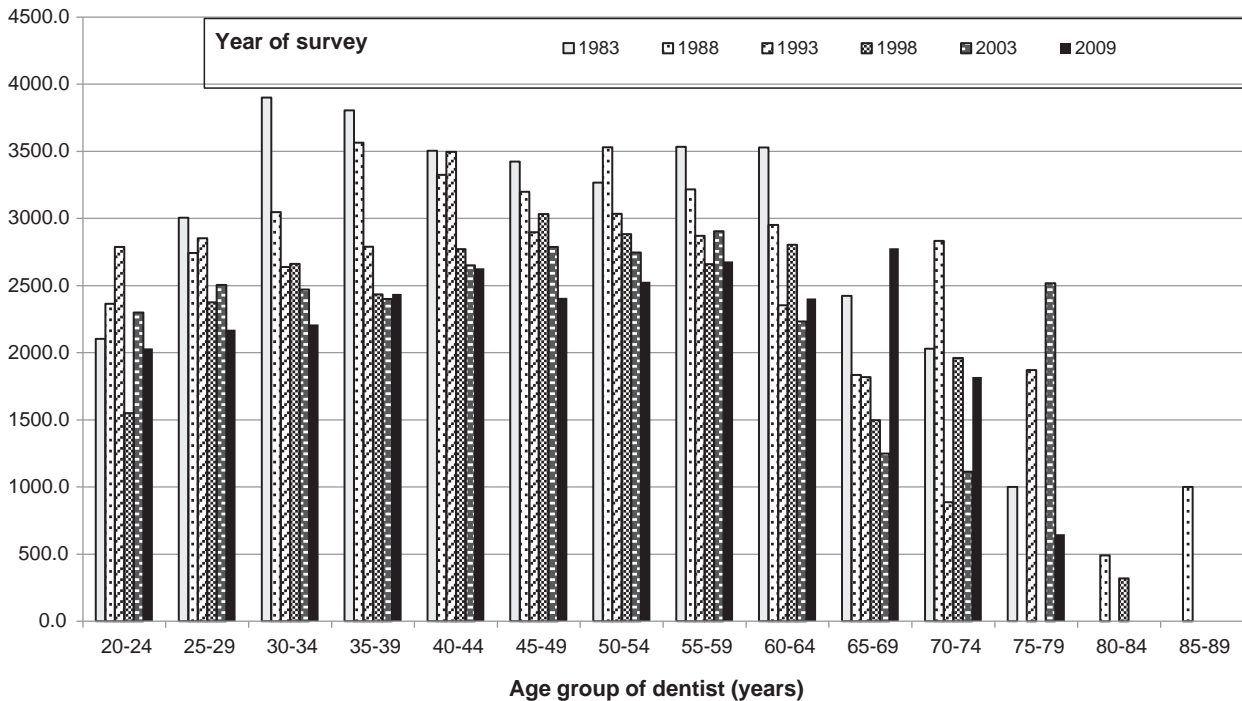

Supplement: MOESM1 [file 9532302]
